# Supplementary material for: Uptake and effectiveness of a tailor-made online lifestyle programme targeting modifiable risk factors for dementia among middle-aged descendants of people with recently diagnosed dementia: study protocol of a cluster randomised controlled trial (Demin study)
Source: HighWire-hosted journal article supplement (doi:10.1136/bmjopen-2020-039439), 2020-10-01
Supplement: bmjopen-2020-039439supp002_data_supplement.pdf [file bmjopen-2020-039439supp002_data_supplement.pdf]

**Supplementary file 2. Overview of assessment measures at baseline and follow up**

| <b>Table 1.</b> Assessment measures at baseline and follow up |                 |                 |                 |                 |                  |
|---------------------------------------------------------------|-----------------|-----------------|-----------------|-----------------|------------------|
|                                                               | <b>Baseline</b> | <b>3 months</b> | <b>6 months</b> | <b>9 months</b> | <b>12 months</b> |
| <b>GENERAL INFORMATION</b>                                    |                 |                 |                 |                 |                  |
| Age, gender, ethnicity, education and postal code             | Q               |                 |                 |                 |                  |
| Participation in the Lifelines cohort                         | Q               |                 |                 |                 |                  |
| Medical family history                                        | Q               |                 |                 |                 |                  |
| Health literacy (S-TOFHLA, 3-items)                           | Q               |                 |                 |                 |                  |
| <b>RISK AND PROTECTIVE FACTORS</b>                            |                 |                 |                 |                 |                  |
| Smoking                                                       | Q               | Q               | Q               | Q               | Q                |
| Physical inactivity (SQUASH, IPAQ sitting measure)            | Q               | Q               | Q               | Q               | Q                |
| Mediterranean diet (FFQ)                                      | Q               | Q               | Q               | Q               | Q                |
| Alcohol consumption (FFQ)                                     | Q               | Q               | Q               | Q               | Q                |
| High cognitive activity (CRIq adapted)                        | Q               | Q               | Q               | Q               | Q                |
| Loneliness (de Jong Gierveld, 6-items)                        | Q               | Q               | Q               | Q               | Q                |
| Cardiovascular diseases (CVD)                                 | Q               | Q               | Q               | Q               | Q                |
| Obesity (body weight, height)                                 | Q+PE            | Q               | Q               | Q               | Q+PE             |
| Hypertension (SBD, DBP)                                       | Q+PE            | Q               | Q               | Q               | Q+PE             |
| High cholesterol (LDL, HDL, TC)                               | Q+BS            | Q               | Q               | Q               | Q+BS             |
| Diabetes Mellitus (glucose,                                   | Q+BS            | Q               | Q               | Q               | Q+BS             |

|                                                                |      |   |   |   |      |
|----------------------------------------------------------------|------|---|---|---|------|
| HbA1C)                                                         |      |   |   |   |      |
| Renal dysfunction (eGFR)                                       | Q+BS | Q | Q | Q | Q+BS |
| Depression (CES-D)                                             | Q    | Q | Q | Q | Q    |
| <b>OTHER PARAMETERS</b>                                        |      |   |   |   |      |
| Medical treatment of disease                                   | Q    | Q | Q | Q | Q    |
| Motivation to change lifestyle<br>(MCLHB-DRR)                  | Q    | Q | Q | Q | Q    |
| Stages of change                                               | Q    | Q | Q | Q | Q    |
| Hearing problems                                               | Q    | Q | Q | Q | Q    |
| Subjective stress (LDI)                                        | Q    |   |   |   | Q    |
| Memory complaints                                              | Q    |   |   |   |      |
| Quality of life (2 items of SF36,<br>VAS-score)                | Q    |   |   |   | Q    |
| Perceived living environment                                   | Q    |   |   |   | Q    |
| Compliance lifestyle advice per<br>individual health behaviour |      | Q | Q | Q | Q    |
| Compliance advice contact with<br>GP                           |      | Q | Q | Q | Q    |

*SQUASH* Short Questionnaire to Assess Health-enhancing physical activity, *IPAQ* International

Physical Activity Questionnaire, *FFQ* Food Frequency Questionnaire, *CRIq* Cognitive Reserve Index

questionnaire, *CVD* Cardiovascular diseases, *SBP* Systolic Blood Pressure, *DBP* Diastolic Blood

Pressure, *HDL* high-density lipoproteins, *LDL* low-density lipoproteins, *TC* total cholesterol, *HbA1C*

Hemoglobin A1C, *eGFR* estimated Glomerular Filtration Rate, *CES-D* Centre for Epidemiological

Studies Depression Scale, *MCLHB-DRR* Motivation to Change Lifestyle and Health Behavior for

Dementia Risk Reduction Scale, *LDI* Long-term Difficulties Inventory, *SF36* Short Form 36 items,

*VAS* Visual Analogue Scale

Q: Online questionnaire; PE: Physical examination; BS: Blood sample
